# Supplementary material for: Binding Mode Characterization of Osteopontin on Hydroxyapatite by Solution NMR Spectroscopy
Source: PubMed Central journal article supplement (PMC8359842; doi:10.1002/cbic.202100139), 2021-05-10
Supplement: CBIC-22-2300-s001.pdf [file CBIC-22-2300-s001.pdf]

# ChemBioChem

Supporting Information

## **Binding Mode Characterization of Osteopontin on Hydroxyapatite by Solution NMR Spectroscopy**

Julian Holzinger,\* Harald Kotisch, Klaus W. Richter, and Robert Konrat

## Supporting Information

### S1 Expression of human OPN

Uniformly  $^{15}\text{N}$ -labelled OPN (residue 17 to 314 of the full-length protein; BMRB ID: P10451) was expressed and purified in its non-phosphorylated form as reported previously<sup>1,2</sup>. As a final step, the buffer was exchanged to the desired measurement buffer (BisTris 50 mM, NaCl 50 mM,  $\text{NaN}_3$  1 mM, pH=6.5).

```
IPVK QADSGSSEEK QLYNKYPDAV ATWLNPDPSQ
KQNLLAPQNA VSSEETNDFK QETLPSKSNE SHDHMDDMDD EDDDDHVDSQ

DSIDSNDSDD VDDTDDSHQS DESHHSDESD ELVTDFPPTDL PATEVFVTPVV
PTVDTYDGRG DSVVYGLRSK SKKFRRPDIQ YPDATDEDIT SHMESEELNG

AYKAIPVAQD LNAPSDWDSR GKDSYETSQ L DDQSAETHSH KQSRLYKRKA
NDESNEHSDV IDSQELSKVS REFHSHEFHSH HEDMLVVDPK SKEEDKHLKF

RISHELDSAS SEVN
```

### S2 Phosphorylation of OPN

$^{15}\text{N}$  OPN was phosphorylated *in vitro* employing the kinase Fam20C. Fam20C was expressed as described previously<sup>1,3</sup>. The phosphorylation was performed as described previously<sup>1</sup> (BMRB ID: P50447).

### S3 MTSL labelling

The  $^{15}\text{N}$  OPN(p) cysteine mutant T185C were incubated with an excess of DTT (10 mM; 15min, RT). A PD-10 Desalting-Column was equilibrated with 100 mM sodium phosphate buffer (1 mM EDTA, pH = 8.0), the protein loaded ( $V_{\text{tot}} = 2.5$  mL) and eluted with 3.4 mL of buffer. Free thiol concentration was checked using a 300 mM DTNB (5,50-dithiobis-(2-nitrobenzoic acid)) solution at 412 nm. A threefold excess of *S*-(1-oxyl-2,2,5,5-tetramethyl-2,5-dihydro-1H-pyrrol-3-yl) methyl methane-sulfonylthioate (MTSL) was added and the sample was incubated under agitation (3 h, 37 °C). Afterwards, the free thiol concentration was checked again. Protein purity was verified via SDS-PAGE electrophoresis. MTSL is a nitroxide spin radical and thus the MTSL-labelled protein serves as the paramagnetic form. The nitroxide group is reduced with ascorbic acid in order to obtain the diamagnetic form.

### S4 Synthesis and Characterization of Hydroxyapatite Nanoparticles

**S4.1 Synthesis.** Hydroxyapatite (HAP) nanoparticles were synthesized by precipitation titration, similar to Matlahov et al.<sup>4</sup>. 16 mL of  $(\text{NH}_4)_2\text{PO}_4$  (0.075 M) were titrated into 56 mL solution consisting of  $\text{Ca}(\text{NO}_3)_2$  (0.04 M) and  $\text{NH}_3$  (0.2 M / 0.8%) at 37°C and pH=9, using a peristaltic pump (0.05 mL/min), and under continuous stirring (850 rpm). After the complete add of the phosphate solution, the mixture was stirred overnight at 60°C. The solid precipitate was filtered (0.45  $\mu\text{m}$ ), washed with ethanol and MilliQ water and dried at 37°C for 48h. The obtained HAP was ground finely in a porcelain mortar and stored as it is. For comparison and to confirm the right sample composition in powder XRD measurements, one HAP sample was calcined at 900°C for 24h.

**S4.2 pXRD.** Powder XRD patterns were obtained with a Bruker D8 Advance diffractometer (Cu  $K\alpha$ ) in pseudo-focussing Bragg-Brentano configuration using variable slits and a silicon strip detector (Lynxeye). Data were analyzed with the TOPAS software<sup>5</sup> and a structural model of the hexagonal HAP (space group  $P6_3/m$ ). Powder XRD diffractograms of the

synthesized HAP nanoparticles, the calcined HAP and the corresponding Rietveld refinements are shown in **Figure S1**. Background corrections, an amorphous foreign phase peak at  $62.48^\circ$  and four reflections of impurities ( $15.02^\circ$ ,  $30.29^\circ$ ,  $37.36^\circ$  and  $46.12^\circ$ ) are included in the refinements, resulting in R-values of  $R_{wp} = 4.11$  (calcined HAP) and  $R_{wp} = 6.35$  (HAP nanoparticles). The calcined sample exhibits sharp reflections (refined average crystalline domain size: 72 nm) at the positions of hexagonal HAP, revealing that the annealing at high temperature produced a highly crystalline HAP. The pattern of the HAP nanoparticles shows broader reflections that can be refined with the same hexagonal structure. The larger peak widths are caused by the average crystallite size of 12 nm (determined with the Scherrer equation). The peaks of the unknown impurity phase correspond either to a simple cubic cell ( $a = 5.898 \text{ \AA}$ ; 001, 002, 211 and 003 reflexes) or a body centered cubic cell ( $a = 8.340 \text{ \AA}$ ; 011, 022, 222 and 411 reflexes) according to an indexing attempt.

**S4.3 Transmission Electron Microscopy.** HAP nanoparticles were suspended and sonicated in ethanol, and deposited on 200 mesh copper R 1.2/1.3 Quantifoil holey carbon grids (Großlöbichau, Germany) for TEM with an additional 2 nm continuous carbon film. After the solvent had evaporated grids were imaged using a Thermo Scientific Glacios transmission electron microscope operated at 200 kV and micrographs were digitally recorded using a Falcon3 direct electron detector in linear mode. Images of the HAP nanoparticles are shown in **Figure S2**. The nanoparticles appear in clusters of seemingly detachable crystallites of platelet-like morphology with an approximate size of 10-20 nm by 5 nm, which is in accordance with the determined crystallite size from the pXRD pattern refinement. Crystal planes can be observed in some crystallites in the micrograph upon the highest magnification (**Figure S2**, bottom).

## S5 Preparation of MeCe Hydrogel

The commercially available Methocel® A4M (Sigma-Aldrich) was dispersed in the pre-heated ( $80^\circ\text{C}$ ) measurement buffer (BisTris 50mM, NaCl 50mM,  $\text{NaN}_3$  1uM, pH=6.5). The mixture was stirred for 15min until the MeCe was thoroughly wetted and in suspension. Afterwards, more buffer was added to the mixture to reach the desired concentration of 2 wt% and it was incubated at  $4^\circ\text{C}$  overnight under agitation.

## S6 Preparation of NMR Sample

**S6.1 Samples in MeCe.** 480 $\mu\text{L}$  of MeCe (2wt%) were mixed with 60 $\mu\text{L}$   $\text{D}_2\text{O}$  and 60 $\mu\text{L}$  of the respective protein solution (final concentration: 0.08 – 0.1 mM for wt; 0.03 – 0.05 mM for T185C mutant), resulting in a MeCe concentration of 1.6 wt%.

**S6.2 Samples w/ HAP.** 0.6 mg HAP were suspended in 480 $\mu\text{L}$  of the MeCe hydrogel/measurement buffer + 60 $\mu\text{L}$   $\text{D}_2\text{O}$  applying 3x1' of sonication (70 W; 30% amplitude; 1s/1s on/off duty cycle), resulting in a HAP concentration of 0.1 wt%. Afterwards, the suspension was extensively mixed with 60 $\mu\text{L}$  of the respective protein solution.

## S7 NMR Experiments

NMR spectra have been acquired at 293K on a Bruker Avance III HD+ 800 spectrometer (18.8 T), using a Bruker RT 5mm TXI probe.  $^{15}\text{N}$ - $T_2$  relaxation data was determined using CPMG delays of 0.017, 0.034, 0.136, 0.271 and 0.543 s. For the STD  $^1\text{H}$ - $^{15}\text{N}$  HSQC experiments, an irradiation pulse (1s; 1.8 kHz) was employed at -5 ppm and -50 ppm for the on- and off-resonance experiment, respectively. For the PRE measurements,  $^1\text{H}^{\text{N}}$ - $R_2$  rates for hOPN(p) T185C were determined employing a pseudo 3-D  $^1\text{H}^{\text{N}}$ - $T_2$  HSQC NMR. Six relaxation delays (0.001, 0.005, 0.01, 0.02, 0.05 and 0.1 s) were used in order to obtain the relaxation rates from exponential decay function fits.

NMR data was processed with nmrPipe<sup>6</sup> and analysed with Sparky<sup>7</sup>. Chemical shift perturbations (CSP) were read out from the respective <sup>1</sup>H-<sup>15</sup>N HSQC spectra and calculated according to:

$$\text{CSP} = \Delta\delta = \sqrt{(\Delta\delta_{\text{H}})^2 + (\Delta\delta_{\text{N}}/5)^2}$$

Binding affinities of Ca<sup>2+</sup> to OPN(p) from titration NMR experiments (**Figure S3** and **S4**) were analyzed and fitted with a low-binding event equation<sup>8</sup> from which the affinities  $K_{\text{D}}$  were determined ( $c(\text{OPN}) = 0.1 \text{ mM}$ ;  $c(\text{OPNp}) = 0.05 \text{ mM}$ ):

$$\text{CSP} = \Delta\delta_{\text{max}}\{([P]_{\text{tot}} + [L]_{\text{tot}} + K_{\text{D}}) - \sqrt{([P]_{\text{tot}} + [L]_{\text{tot}} + K_{\text{D}})^2 - 4[P]_{\text{tot}}[L]_{\text{tot}}}\} / 2[P]_{\text{tot}}$$

**Figures S3** and **S4** show the fit analysis performed for selected sets of residues from the regions with the largest chemical shift perturbations.

The STD effect ( $\Delta\text{STD}$ ) was quantified by a normalization of the spectral intensities by running the same experiment with and without the saturation pulse ( $\text{STD}_x$  and  $\text{HSQC}_x$ ) and under the compared conditions ( $a$  and  $b$ ; e.g. +HAP and apo). It was calculated as follows:

$$\Delta\text{STD} = (\text{STD}_a/\text{HSQC}_a) / (\text{STD}_b/\text{HSQC}_b)$$

The PRE effect ( $\Delta(^1\text{H}^{\text{N}})\Gamma_2$ ) is quantified according to:

$$\Delta(^1\text{H}^{\text{N}})\Gamma_2 = (^1\text{H}^{\text{N}})\text{R}_{2,\text{para}} - (^1\text{H}^{\text{N}})\text{R}_{2,\text{dia}}$$

### S8 Adsorption Isotherms (OPN(p) + HAP)

Known initial concentrations of OPN(p) ( $c_0 = 0.004 - 0.08 \text{ mM}$ ;  $V_0 = 0.4 \text{ mL}$ ) were equilibrated with 0.6 mg of HAP nanoparticles for 4h under agitation. Nanoparticles were separated from the supernatant by centrifugation (13k rpm, 20 min). The equilibrium protein concentration  $c_{\text{eq}}$  in the separated supernatant was determined by UV-vis spectrophotometry using a NanoDrop<sup>TM</sup> (Thermo Fisher). The equilibrium fractional saturation  $q_{\text{eq}}$  was calculated as follows:

$$q_{\text{eq}} = (c_0 - c_{\text{eq}}) V_0 / m_{\text{HAP}}$$

The data (**Figure S5**) was fitted with a Langmuir isotherm from which the monolayer sorption saturation capacity  $X_{\text{m}}$  and the dissociation constant  $K_{\text{D}}$  were determined ( $a_{\text{L}}$ : Langmuir constant):

$$q = (X_{\text{m}} a_{\text{L}} c_{\text{eq}}) / (1 + a_{\text{L}} c_{\text{eq}}) = X_{\text{m}} c_{\text{eq}} / (a_{\text{L}}^{-1} + c_{\text{eq}}) = X_{\text{m}} c_{\text{eq}} / (K_{\text{D}} + c_{\text{eq}})$$

The obtained dissociation constants  $K_{\text{D}}$  for OPN and OPNp adsorbing onto HAP nanoparticles are 28(17)  $\mu\text{M}$  and 14(4)  $\mu\text{M}$ , respectively; the monolayer sorption saturation capacities  $X_{\text{m}}$  are 0.011(3)  $\mu\text{mol/mg}$  and 0.006(1)  $\mu\text{mol/mg}$ , respectively.

### S9 Table of chemical shift perturbations

The CSPs of all residues in OPN and OPNp upon interaction to Ca<sup>2+</sup> (ratio 1:120 and saturated) and HAP can be found in a table on page S13.

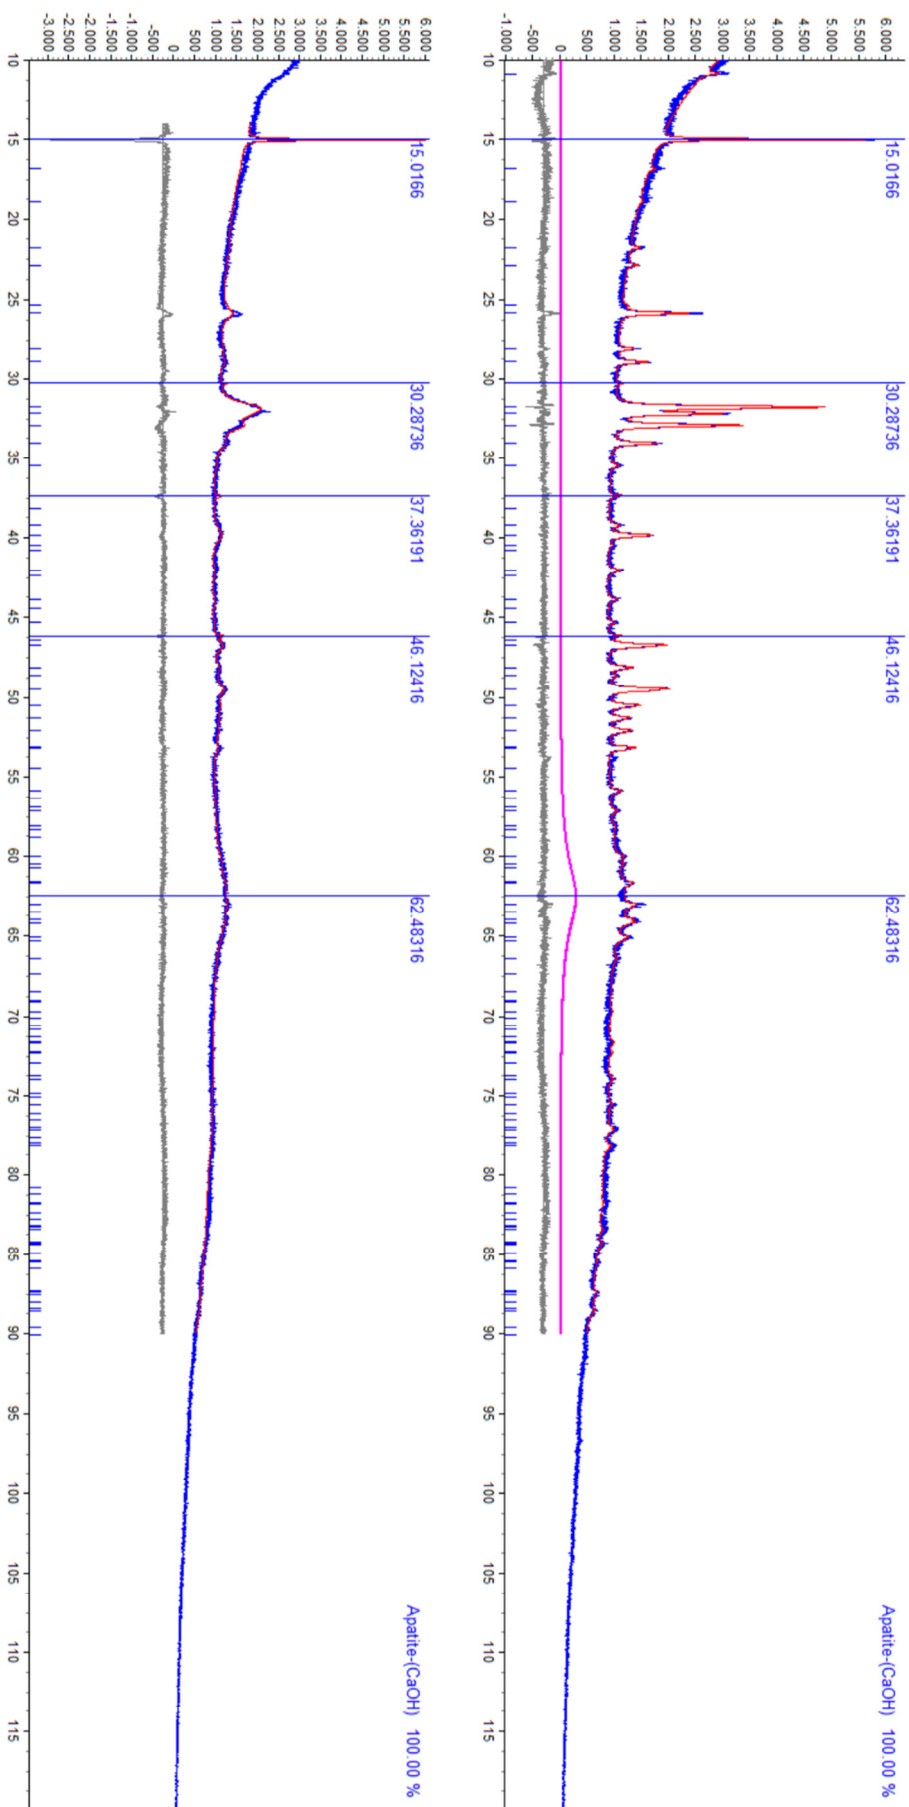

**Figure S1.** Rietveld refinement of the powder XRD patterns of the calcined HAP (top) and the HAP nanoparticles (bottom), including the observed intensities (blue), calculated intensities (red), amorphous peak (pink) and difference intensities (grey), using a hexagonal HAP with P63/m symmetry. Impurities and the corresponding reflection angles are marked with a blue bar.

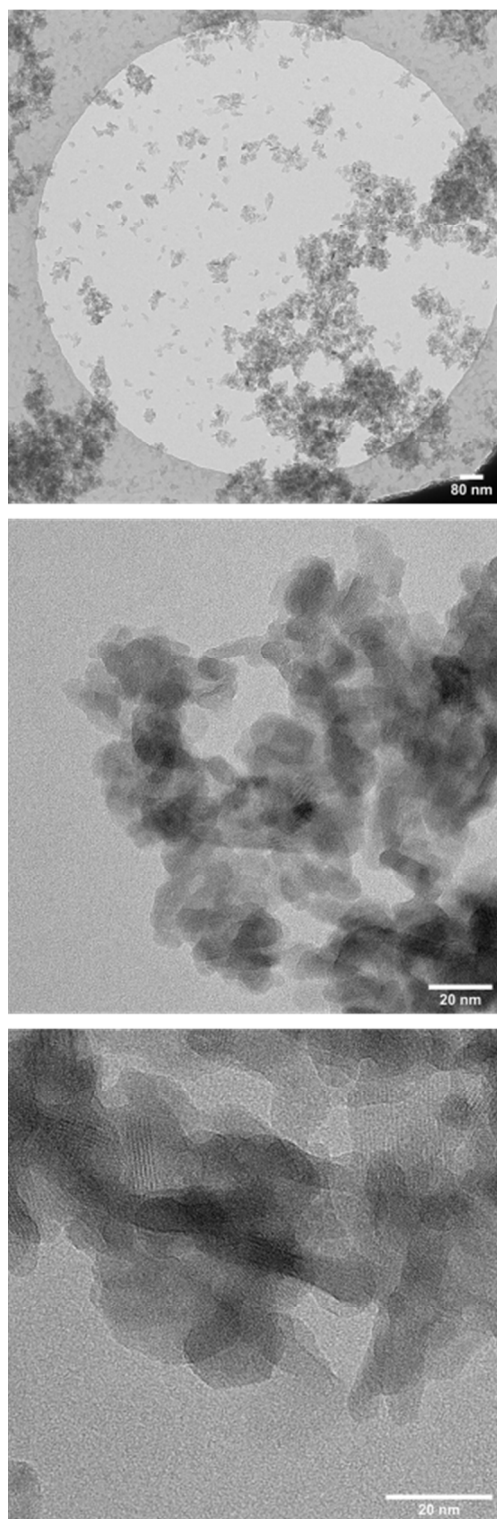

**Figure S2.** TEM micrographs of the synthesized HAP nanoparticles, recorded at three different magnifications with pixel size of 4.12, 0.38 and 0.27 Å, respectively (top to bottom).

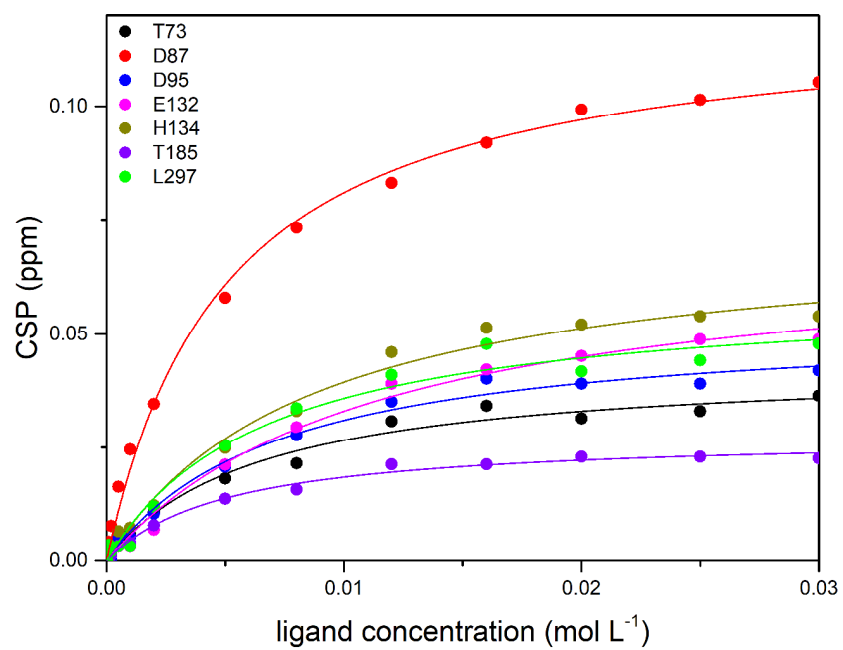

**Figure S3.** Selected titration curves from <sup>1</sup>H-<sup>15</sup>N HSQC NMR spectra for <sup>15</sup>N-labelled OPN titrated with CaCl<sub>2</sub> for the residues T73, D87, D95, E132, H134, T185 and L297, together with the corresponding low-binding event fit (thin lines).

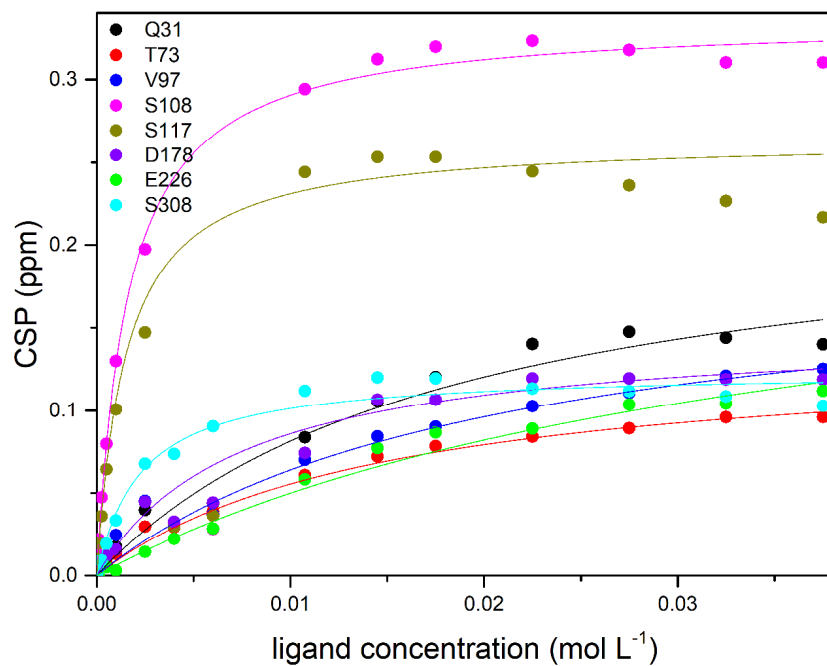

**Figure S4.** Selected titration curves from <sup>1</sup>H-<sup>15</sup>N HSQC NMR spectra for <sup>15</sup>N-labelled OPNp titrated with CaCl<sub>2</sub> for the residues Q31, T73, V97, S108, S117, D178, E226 and S308, together with the corresponding low-binding event fit (thin lines).



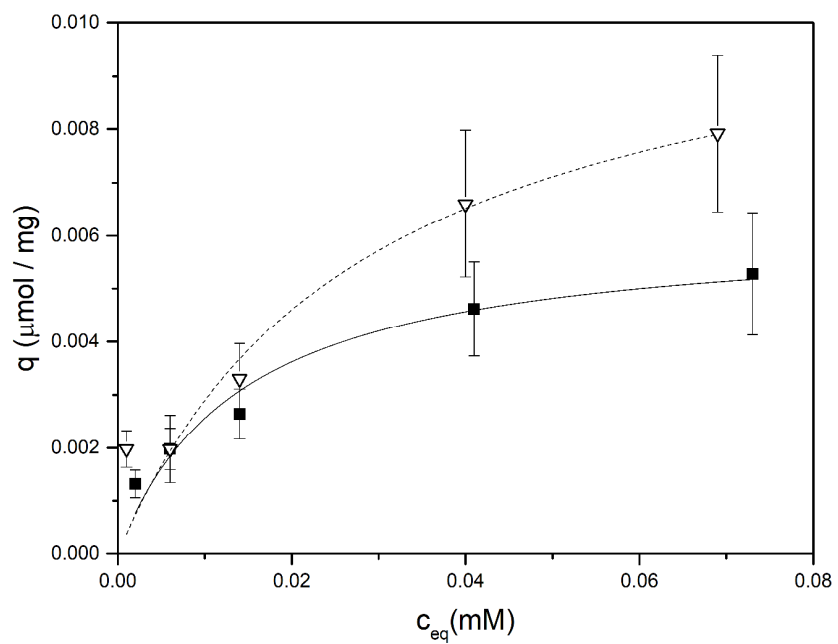

**Figure S5.** Adsorption isotherms for OPN (open triangles) and OPNp (filled squares) interacting with HAP, including standard deviations and corresponding fits, from which the monolayer sorption saturation capacities  $X_m$  and dissociation constants  $K_D$  were obtained ( $X_m$  (OPN) = 0.011(3)  $\mu\text{mol/mg}$  and  $K_D$  (OPN) = 28(17)  $\mu\text{M}$ ;  $X_m$  (OPNp) = 0.006(1)  $\mu\text{mol/mg}$  and  $K_D$  (OPNp) = 14(4)  $\mu\text{M}$ ).

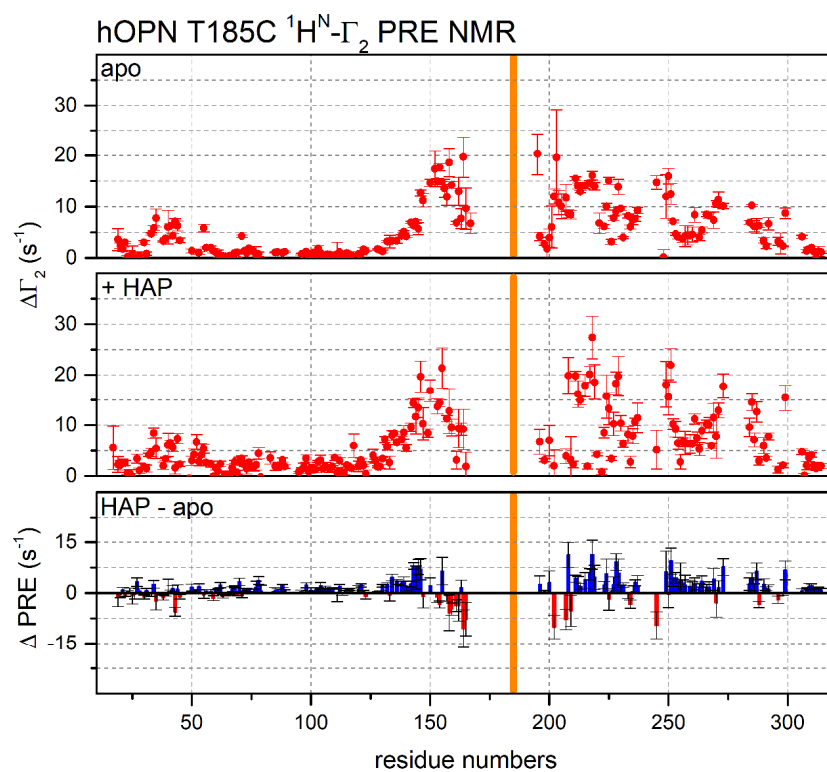

**Figure S6.** Effect of the interaction of the OPN cysteine mutant T185C with HAP on long-range interactions measured by  $^1\text{H}^{\text{N}}-\text{T}_2$  NMR experiments. PRE profiles  $\Delta\Gamma_2$  of the apo form (top) and OPN + HAP (middle). PRE rates difference plot  $\Delta$  PRE =  $\Gamma_2(\text{OPN\_HAP}) - \Gamma_2(\text{OPN\_apo})$  (bottom). Orange bars indicate the mutated cysteine residue with the attached MTSL label.

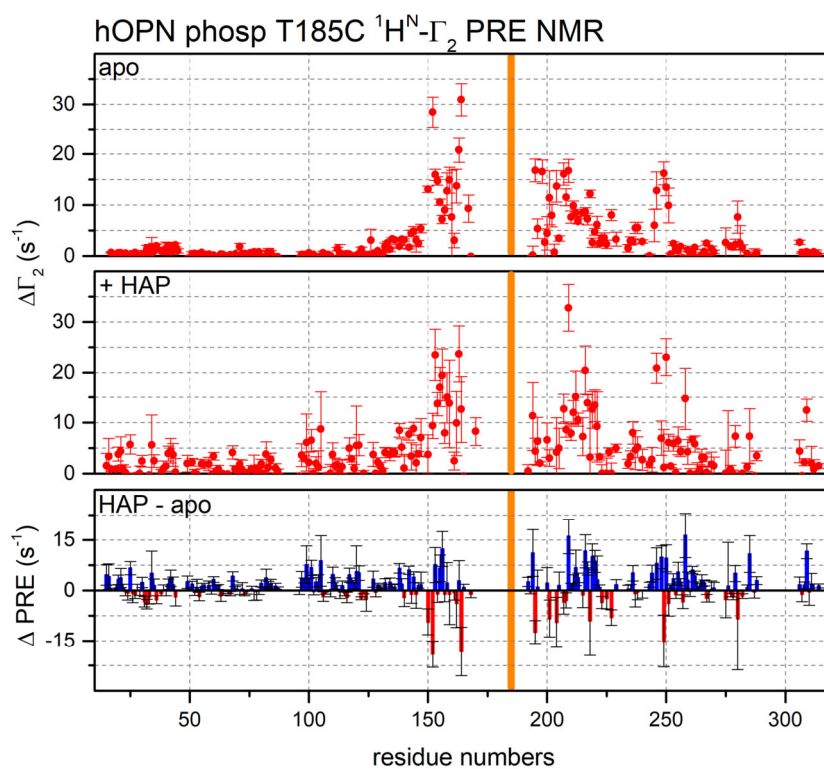

**Figure S7.** Effect of the interaction of the phosphorylated OPNp cysteine mutant T185C with HAP on long-range interactions measured by  $^1\text{H}^{\text{N}}\text{-}\Gamma_2$  NMR experiments. PRE profiles  $\Delta\Gamma_2$  of the apo form (top) and OPNp + HAP (middle). PRE rates difference plot  $\Delta$  PRE =  $\Gamma_2(\text{OPNp\_HAP}) - \Gamma_2(\text{OPNp\_apo})$  (bottom). Orange bars indicate the mutated cysteine residue with the attached MTSL label.

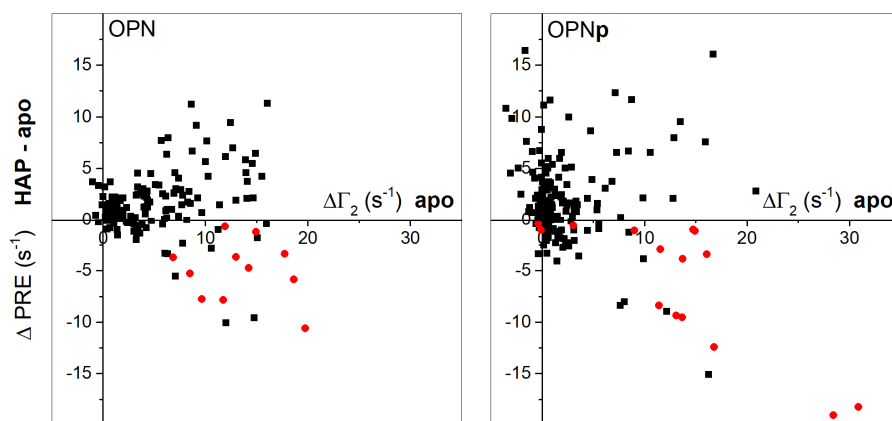

**Figure S8.** Correlation map of the PRE rates difference  $\Delta \text{PRE} = \Gamma_2(\text{OPN(p\_HAP)}) - \Gamma_2(\text{OPN(p\_apo)})$  and the PRE rates  $\Delta\Gamma_2$  of the apo form of OPN (left) and OPNp (right). The red dots are from residues in the vicinity of the mutation site (residue 150-210).

## References

- [1] B. Mateos, J. Holzinger, C. Conrad-Billroth, G. Platzer, S. Žerkob, M. Sealey-Cardonac, D. Anrather, W. Koźmiński, R. Konrat, *Biochemistry* **2021**, *XX*, XXX-XXX.
- [2] G. Platzer, S. Žerko, S. Saxena, W. Koźmiński, R. Konrat, *Biomol. NMR Assign.* **2015**, *9*, 289–292.
- [3] V. S. Tagliabracci, J. L. Engel, J. Wen, S. E. Wiley, C. A. Worby, L. N. Kinch, J. Xiao, N. V. Grishin, J. E. Dixon, *Science* **2012**, *336*, 1150–1153.
- [4] I. Matlahov, T. Iline-Vul, M. Abayev, E. M. Y. Lee, M. Nadav-Tsubery, K. Keinan-Adamsky, J. J. Gray, G. Goobes, *Chem. Mater.* **2015**, *27*, 5562–5569.
- [5] A. X. S. Bruker, *TOPAS V4.2: General Profile and Structure Analysis Software for Powder Diffraction Data* **2009**, Karlsruhe, Germany.
- [6] F. Delaglio, S. Grzesiek, G. W. Vuister, G. Zhu, J. Pfeifer, A. Bax, *J. Biomol. NMR* **1995**, *6*, 277–293.
- [7] W. Lee, M. Tonelli und J. L. Markley, *Bioinformatics* **2014**, *31*, 1325-1327.
- [8] M. P. Williamson, *Prog. Nucl. Magn. Reson. Spectrosc.* **2013**, *73*, 1-16.

**S9 Table of chemical shift perturbations**, including CSPs (in ppm) of all residues in OPN and OPNp upon interaction to Ca<sup>2+</sup> (ratio 1:120 and saturated) and HAP.

| OPN     |    |                   |                   |       |  | OPNp    |    |                   |                    |       |
|---------|----|-------------------|-------------------|-------|--|---------|----|-------------------|--------------------|-------|
| residue | AA | CSP               | CSP               | CSP   |  | residue | AA | CSP               | CSP                | CSP   |
|         |    | + Ca2+<br>(1:120) | + Ca2+<br>(1:300) | + HAP |  |         |    | + Ca2+<br>(1:120) | + Ca2+<br>(1:750 ) | + HAP |
| 17      | I  | 0.043             | 0.038             | 0.017 |  | 17      | I  | 0.011             | 0.027              | 0.002 |
| 18      | P  |                   |                   |       |  | 18      | P  |                   |                    |       |
| 19      | V  | 0.000             | 0.001             | 0.000 |  | 19      | V  | 0.031             | 0.030              | 0.003 |
| 20      | K  | 0.003             | 0.003             | 0.000 |  | 20      | K  | 0.004             | 0.012              | 0.001 |
| 21      | Q  | 0.009             | 0.014             | 0.000 |  | 21      | Q  | 0.021             | 0.062              | 0.006 |
| 22      | A  | 0.004             | 0.001             | 0.004 |  | 22      | A  | 0.017             | 0.042              | 0.002 |
| 23      | D  | 0.005             | 0.007             | 0.005 |  | 23      | D  | 0.034             | 0.096              | 0.005 |
| 24      | S  | 0.008             | 0.014             | 0.013 |  | 24      | pS | 0.069             | 0.181              | 0.017 |
| 25      | G  | 0.001             | 0.005             | 0.000 |  | 25      | G  | 0.021             | 0.037              | 0.018 |
| 26      | S  | 0.004             | 0.007             | 0.027 |  | 26      | pS | 0.021             | 0.011              | 0.048 |
| 27      | S  | 0.002             | 0.001             | 0.009 |  | 27      | pS | 0.054             | 0.068              | 0.054 |
| 28      | E  | 0.001             | 0.002             | 0.004 |  | 28      | E  | 0.007             | 0.021              | 0.017 |
| 29      | E  |                   |                   |       |  | 29      | E  | 0.028             | 0.041              | 0.019 |
| 30      | K  | 0.006             | 0.013             | 0.000 |  | 30      | K  | 0.059             | 0.067              | 0.017 |
| 31      | Q  | 0.010             | 0.025             | 0.004 |  | 31      | Q  | 0.055             | 0.144              | 0.014 |
| 32      | L  | 0.010             | 0.016             | 0.003 |  | 32      | L  | 0.044             | 0.115              | 0.007 |
| 33      | Y  | 0.011             | 0.016             | 0.005 |  | 33      | Y  | 0.038             | 0.099              | 0.010 |
| 34      | N  | 0.001             | 0.007             | 0.000 |  | 34      | N  | 0.025             | 0.071              | 0.004 |
| 35      | K  | 0.004             | 0.002             | 0.000 |  | 35      | K  | 0.001             | 0.017              | 0.022 |
| 36      | Y  |                   |                   |       |  | 36      | Y  | 0.003             | 0.010              | 0.003 |
| 37      | P  |                   |                   |       |  | 37      | P  |                   |                    |       |
| 38      | D  | 0.009             | 0.008             | 0.003 |  | 38      | D  | 0.002             | 0.012              | 0.003 |
| 39      | A  | 0.003             | 0.009             | 0.000 |  | 39      | A  | 0.005             | 0.009              | 0.007 |
| 40      | V  | 0.003             | 0.001             | 0.000 |  | 40      | V  | 0.007             | 0.003              | 0.000 |
| 41      | A  | 0.000             | 0.002             | 0.000 |  | 41      | A  | 0.006             | 0.006              | 0.004 |
| 42      | T  | 0.003             | 0.003             | 0.004 |  | 42      | T  | 0.003             | 0.003              | 0.004 |
| 43      | W  | 0.003             | 0.003             | 0.005 |  | 43      | W  | 0.005             | 0.009              | 0.004 |
| 44      | L  | 0.005             | 0.006             | 0.004 |  | 44      | L  | 0.009             | 0.018              | 0.002 |
| 45      | N  | 0.009             | 0.004             | 0.004 |  | 45      | N  | 0.002             | 0.017              | 0.000 |
| 46      | P  |                   |                   |       |  | 46      | P  |                   |                    |       |
| 47      | D  |                   |                   |       |  | 47      | D  |                   |                    |       |
| 48      | P  |                   |                   |       |  | 48      | P  |                   |                    |       |
| 49      | S  | 0.001             | 0.005             | 0.000 |  | 49      | S  | 0.005             | 0.005              | 0.000 |
| 50      | Q  | 0.012             | 0.021             | 0.006 |  | 50      | Q  |                   |                    |       |
| 51      | K  | 0.003             | 0.006             | 0.000 |  | 51      | K  | 0.012             | 0.009              | 0.004 |
| 52      | Q  | 0.003             | 0.024             | 0.000 |  | 52      | Q  | 0.006             | 0.009              | 0.000 |
| 53      | N  | 0.006             | 0.009             | 0.006 |  | 53      | N  | 0.010             | 0.011              | 0.004 |
| 54      | L  | 0.006             | 0.006             | 0.011 |  | 54      | L  | 0.006             | 0.015              | 0.005 |
| 55      | L  | 0.012             | 0.012             | 0.004 |  | 55      | L  | 0.017             | 0.031              | 0.006 |
| 56      | A  | 0.004             | 0.006             | 0.004 |  | 56      | A  | 0.010             | 0.018              | 0.002 |

|     |   |       |       |       |  |     |    |       |       |       |
|-----|---|-------|-------|-------|--|-----|----|-------|-------|-------|
| 57  | P |       |       |       |  | 57  | P  |       |       |       |
| 58  | Q | 0.005 | 0.007 | 0.003 |  | 58  | Q  | 0.016 | 0.028 | 0.006 |
| 59  | N | 0.009 | 0.009 | 0.000 |  | 59  | N  | 0.012 | 0.011 | 0.000 |
| 60  | A | 0.005 | 0.009 | 0.000 |  | 60  | A  | 0.024 | 0.041 | 0.012 |
| 61  | V | 0.005 | 0.005 | 0.003 |  | 61  | V  | 0.010 | 0.027 | 0.010 |
| 62  | S | 0.008 | 0.012 | 0.004 |  | 62  | pS | 0.025 | 0.069 | 0.047 |
| 63  | S | 0.002 | 0.005 | 0.002 |  | 63  | pS | 0.119 | 0.173 | 0.086 |
| 64  | E | 0.005 | 0.008 | 0.003 |  | 64  | E  | 0.032 | 0.048 | 0.003 |
| 65  | E |       |       |       |  | 65  | E  |       |       |       |
| 66  | T | 0.013 | 0.019 | 0.000 |  | 66  | T  | 0.035 | 0.080 | 0.002 |
| 67  | N | 0.004 | 0.003 | 0.007 |  | 67  | N  | 0.014 | 0.021 | 0.006 |
| 68  | D | 0.011 | 0.012 | 0.000 |  | 68  | D  | 0.022 | 0.031 | 0.002 |
| 69  | F | 0.007 | 0.009 | 0.001 |  | 69  | F  | 0.014 | 0.024 | 0.006 |
| 70  | K | 0.029 | 0.037 | 0.009 |  | 70  | K  | 0.028 | 0.015 | 0.008 |
| 71  | Q | 0.013 | 0.010 | 0.014 |  | 71  | Q  | 0.011 | 0.019 | 0.000 |
| 72  | E | 0.018 | 0.015 | 0.003 |  | 72  | E  | 0.034 | 0.056 | 0.006 |
| 73  | T | 0.031 | 0.036 | 0.010 |  | 73  | T  | 0.050 | 0.092 | 0.019 |
| 74  | L | 0.017 | 0.023 | 0.006 |  | 74  | L  | 0.039 | 0.077 | 0.014 |
| 75  | P |       |       |       |  | 75  | P  |       |       |       |
| 76  | S | 0.021 | 0.024 | 0.012 |  | 76  | S  | 0.021 | 0.047 | 0.005 |
| 77  | K | 0.009 | 0.011 | 0.005 |  | 77  | K  | 0.010 | 0.015 | 0.002 |
| 78  | S | 0.035 | 0.050 | 0.015 |  | 78  | pS | 0.057 | 0.165 | 0.025 |
| 79  | N | 0.013 | 0.015 | 0.014 |  | 79  | N  | 0.013 | 0.077 | 0.004 |
| 80  | E |       |       |       |  | 80  | E  | 0.008 | 0.039 | 0.025 |
| 81  | S |       |       |       |  | 81  | pS | 0.019 | 0.006 | 0.043 |
| 82  | H |       |       |       |  | 82  | H  | 0.011 | 0.036 | 0.008 |
| 83  | D | 0.001 | 0.008 | 0.000 |  | 83  | D  | 0.025 | 0.034 | 0.015 |
| 84  | H | 0.004 | 0.014 | 0.037 |  | 84  | H  | 0.023 | 0.038 | 0.013 |
| 85  | M | 0.034 | 0.043 | 0.007 |  | 85  | M  |       |       |       |
| 86  | D | 0.022 | 0.036 | 0.022 |  | 86  | D  | 0.009 | 0.012 | 0.008 |
| 87  | D | 0.083 | 0.105 | 0.054 |  | 87  | D  | 0.019 | 0.028 | 0.021 |
| 88  | M | 0.049 | 0.064 | 0.030 |  | 88  | M  |       |       |       |
| 89  | D | 0.030 | 0.043 | 0.009 |  | 89  | D  |       |       |       |
| 90  | D |       |       |       |  | 90  | D  |       |       |       |
| 91  | E |       |       |       |  | 91  | E  |       |       |       |
| 92  | D |       |       |       |  | 92  | D  |       |       |       |
| 93  | D |       |       |       |  | 93  | D  |       |       |       |
| 94  | D |       |       |       |  | 94  | D  |       |       |       |
| 95  | D | 0.035 | 0.042 | 0.009 |  | 95  | D  |       |       |       |
| 96  | H | 0.026 | 0.033 | 0.015 |  | 96  | H  | 0.073 | 0.126 | 0.036 |
| 97  | V | 0.030 | 0.039 | 0.022 |  | 97  | V  | 0.082 | 0.135 | 0.005 |
| 98  | D | 0.012 | 0.008 | 0.005 |  | 98  | D  | 0.037 | 0.050 | 0.011 |
| 99  | S | 0.020 | 0.023 | 0.015 |  | 99  | pS | 0.041 | 0.011 | 0.051 |
| 100 | Q | 0.020 | 0.023 | 0.005 |  | 100 | Q  | 0.022 | 0.022 | 0.014 |
| 101 | D | 0.005 | 0.015 | 0.007 |  | 101 | D  | 0.044 | 0.052 | 0.025 |
| 102 | S | 0.041 | 0.046 | 0.021 |  | 102 | S  | 0.039 | 0.034 | 0.020 |
| 103 | I | 0.017 | 0.016 | 0.007 |  | 103 | I  | 0.047 | 0.067 | 0.025 |

|     |   |       |       |       |  |     |    |       |       |       |
|-----|---|-------|-------|-------|--|-----|----|-------|-------|-------|
| 104 | D | 0.058 | 0.059 | 0.027 |  | 104 | D  | 0.028 | 0.029 | 0.010 |
| 105 | S | 0.014 | 0.019 | 0.008 |  | 105 | pS | 0.095 | 0.025 | 0.053 |
| 106 | N | 0.023 | 0.030 | 0.008 |  | 106 | N  | 0.023 | 0.029 | 0.032 |
| 107 | D | 0.000 | 0.016 | 0.006 |  | 107 | D  | 0.051 | 0.093 | 0.013 |
| 108 | S | 0.039 | 0.058 | 0.017 |  | 108 | pS | 0.227 | 0.287 | 0.085 |
| 109 | D | 0.023 | 0.031 | 0.008 |  | 109 | D  | 0.028 | 0.064 | 0.045 |
| 110 | D | 0.011 | 0.018 | 0.009 |  | 110 | D  | 0.008 | 0.006 | 0.025 |
| 111 | V | 0.020 | 0.020 | 0.013 |  | 111 | V  | 0.047 | 0.047 | 0.026 |
| 112 | D | 0.033 | 0.038 | 0.007 |  | 112 | D  | 0.008 | 0.017 | 0.016 |
| 113 | D | 0.038 | 0.037 | 0.014 |  | 113 | D  | 0.030 | 0.085 | 0.034 |
| 114 | T | 0.033 | 0.032 | 0.013 |  | 114 | T  | 0.080 | 0.112 | 0.043 |
| 115 | D | 0.014 | 0.020 | 0.013 |  | 115 | D  | 0.031 | 0.048 | 0.002 |
| 116 | D | 0.036 | 0.041 | 0.012 |  | 116 | D  | 0.043 | 0.045 | 0.029 |
| 117 | S | 0.001 | 0.005 | 0.006 |  | 117 | pS | 0.165 | 0.186 | 0.092 |
| 118 | H | 0.003 | 0.009 | 0.008 |  | 118 | H  | 0.036 | 0.065 | 0.023 |
| 119 | Q |       |       |       |  | 119 | Q  | 0.029 | 0.052 | 0.013 |
| 120 | S | 0.008 | 0.008 | 0.004 |  | 120 | pS | 0.077 | 0.076 | 0.059 |
| 121 | D | 0.012 | 0.016 | 0.004 |  | 121 | D  | 0.050 | 0.047 | 0.058 |
| 122 | E | 0.024 | 0.025 | 0.009 |  | 122 | E  | 0.040 | 0.061 | 0.012 |
| 123 | S | 0.028 | 0.026 | 0.005 |  | 123 | pS | 0.009 | 0.031 | 0.036 |
| 124 | H | 0.025 | 0.043 | 0.017 |  | 124 | H  | 0.007 | 0.019 | 0.017 |
| 125 | H |       |       |       |  | 125 | H  | 0.023 | 0.074 | 0.016 |
| 126 | S | 0.009 | 0.002 | 0.012 |  | 126 | pS | 0.054 | 0.083 | 0.049 |
| 127 | D | 0.014 | 0.014 | 0.005 |  | 127 | D  | 0.021 | 0.020 | 0.006 |
| 128 | E | 0.012 | 0.022 | 0.012 |  | 128 | E  | 0.024 | 0.064 | 0.017 |
| 129 | S | 0.004 | 0.009 | 0.008 |  | 129 | pS | 0.064 | 0.010 | 0.044 |
| 130 | D | 0.008 | 0.012 | 0.011 |  | 130 | D  | 0.010 | 0.036 | 0.018 |
| 131 | E | 0.005 | 0.010 | 0.000 |  | 131 | E  | 0.059 | 0.039 | 0.019 |
| 132 | L | 0.039 | 0.049 | 0.006 |  | 132 | L  | 0.078 | 0.144 | 0.020 |
| 133 | V | 0.013 | 0.011 | 0.012 |  | 133 | V  | 0.019 | 0.036 | 0.007 |
| 134 | T | 0.046 | 0.054 | 0.014 |  | 134 | T  | 0.058 | 0.102 | 0.016 |
| 135 | D | 0.009 | 0.010 | 0.003 |  | 135 | D  | 0.011 | 0.022 | 0.000 |
| 136 | F | 0.009 | 0.011 | 0.002 |  | 136 | F  | 0.030 | 0.043 | 0.013 |
| 137 | P |       |       |       |  | 137 | P  |       |       |       |
| 138 | T | 0.027 | 0.035 | 0.009 |  | 138 | T  | 0.033 | 0.060 | 0.010 |
| 139 | D | 0.005 | 0.010 | 0.000 |  | 139 | D  | 0.017 | 0.009 | 0.024 |
| 140 | L | 0.005 | 0.002 | 0.005 |  | 140 | L  | 0.017 | 0.020 | 0.004 |
| 141 | P |       |       |       |  | 141 | P  |       |       |       |
| 142 | A | 0.010 | 0.008 | 0.000 |  | 142 | A  | 0.063 | 0.112 | 0.004 |
| 143 | T | 0.014 | 0.021 | 0.006 |  | 143 | T  | 0.035 | 0.075 | 0.004 |
| 144 | E | 0.004 | 0.005 | 0.004 |  | 144 | E  | 0.021 | 0.034 | 0.000 |
| 145 | V | 0.007 | 0.007 | 0.003 |  | 145 | V  | 0.027 | 0.056 | 0.004 |
| 146 | F | 0.008 | 0.013 | 0.005 |  | 146 | F  | 0.019 | 0.026 | 0.008 |
| 147 | T | 0.008 | 0.007 | 0.006 |  | 147 | T  | 0.020 | 0.041 | 0.000 |
| 148 | P |       |       |       |  | 148 | P  |       |       |       |
| 149 | V | 0.003 | 0.009 | 0.004 |  | 149 | V  |       |       |       |
| 150 | V | 0.010 | 0.009 | 0.009 |  | 150 | V  | 0.031 | 0.054 | 0.005 |



|     |   |       |       |       |  |     |    |       |       |       |
|-----|---|-------|-------|-------|--|-----|----|-------|-------|-------|
| 151 | P |       |       |       |  | 151 | P  |       |       |       |
| 152 | T | 0.007 | 0.005 | 0.003 |  | 152 | T  | 0.020 | 0.032 | 0.009 |
| 153 | V | 0.004 | 0.017 | 0.004 |  | 153 | V  | 0.021 | 0.033 | 0.000 |
| 154 | D | 0.004 | 0.015 | 0.000 |  | 154 | D  | 0.021 | 0.032 | 0.008 |
| 155 | T | 0.002 | 0.013 | 0.000 |  | 155 | T  | 0.006 | 0.009 | 0.003 |
| 156 | Y | 0.002 | 0.006 | 0.000 |  | 156 | Y  | 0.006 | 0.009 | 0.000 |
| 157 | D | 0.004 | 0.009 | 0.000 |  | 157 | D  | 0.035 | 0.022 | 0.005 |
| 158 | G | 0.002 | 0.006 | 0.003 |  | 158 | G  | 0.004 | 0.007 | 0.003 |
| 159 | R | 0.008 | 0.014 | 0.005 |  | 159 | R  | 0.006 | 0.018 | 0.005 |
| 160 | G | 0.013 | 0.025 | 0.003 |  | 160 | G  | 0.003 | 0.030 | 0.000 |
| 161 | D | 0.011 | 0.009 | 0.003 |  | 161 | D  | 0.001 | 0.017 | 0.004 |
| 162 | S | 0.005 | 0.002 | 0.000 |  | 162 | S  | 0.003 | 0.005 | 0.005 |
| 163 | V | 0.009 | 0.007 | 0.008 |  | 163 | V  | 0.009 | 0.011 | 0.002 |
| 164 | V | 0.009 | 0.002 | 0.011 |  | 164 | V  | 0.034 | 0.036 | 0.015 |
| 165 | Y | 0.011 | 0.006 | 0.013 |  | 165 | Y  | 0.033 | 0.054 | 0.010 |
| 166 | G | 0.003 | 0.010 | 0.008 |  | 166 | G  | 0.020 | 0.023 | 0.010 |
| 167 | L | 0.003 | 0.010 | 0.000 |  | 167 | L  | 0.005 | 0.008 | 0.000 |
| 168 | R |       |       |       |  | 168 | R  | 0.010 | 0.026 | 0.017 |
| 169 | S |       |       |       |  | 169 | S  | 0.042 | 0.092 | 0.019 |
| 170 | K |       |       |       |  | 170 | K  | 0.015 | 0.044 | 0.010 |
| 171 | S |       |       |       |  | 171 | S  | 0.038 | 0.070 | 0.012 |
| 172 | K |       |       |       |  | 172 | K  | 0.019 | 0.051 | 0.012 |
| 173 | K |       |       |       |  | 173 | K  | 0.021 | 0.020 | 0.009 |
| 174 | F |       |       |       |  | 174 | F  | 0.081 | 0.066 | 0.004 |
| 175 | R |       |       |       |  | 175 | R  |       |       |       |
| 176 | R |       |       |       |  | 176 | R  |       |       |       |
| 177 | P |       |       |       |  | 177 | P  |       |       |       |
| 178 | D | 0.012 | 0.045 | 0.026 |  | 178 | D  | 0.083 | 0.188 | 0.017 |
| 179 | I | 0.005 | 0.023 | 0.021 |  | 179 | I  | 0.044 | 0.138 | 0.017 |
| 180 | Q | 0.003 | 0.010 | 0.010 |  | 180 | Q  | 0.017 | 0.055 | 0.002 |
| 181 | Y | 0.008 | 0.004 | 0.016 |  | 181 | Y  | 0.016 | 0.017 | 0.005 |
| 182 | P |       |       |       |  | 182 | P  |       |       |       |
| 183 | D | 0.002 | 0.005 | 0.006 |  | 183 | D  | 0.022 | 0.060 | 0.002 |
| 184 | A | 0.006 | 0.032 | 0.009 |  | 184 | A  | 0.029 | 0.117 | 0.012 |
| 185 | T | 0.021 | 0.023 | 0.007 |  | 185 | pT | 0.034 | 0.253 | 0.098 |
| 186 | D | 0.011 | 0.020 | 0.004 |  | 186 | D  |       |       |       |
| 187 | E | 0.054 | 0.048 | 0.046 |  | 187 | E  |       |       |       |
| 188 | D | 0.006 | 0.011 | 0.003 |  | 188 | D  | 0.016 | 0.043 | 0.004 |
| 189 | I | 0.007 | 0.009 | 0.005 |  | 189 | I  | 0.021 | 0.012 | 0.006 |
| 190 | T | 0.004 | 0.010 | 0.010 |  | 190 | T  | 0.008 | 0.024 | 0.010 |
| 191 | S | 0.003 | 0.011 | 0.012 |  | 191 | pS | 0.071 | 0.040 | 0.052 |
| 192 | H | 0.024 | 0.040 | 0.007 |  | 192 | H  | 0.009 | 0.010 | 0.004 |
| 193 | M |       |       |       |  | 193 | M  | 0.057 | 0.052 | 0.019 |
| 194 | E | 0.008 | 0.001 | 0.018 |  | 194 | E  | 0.003 | 0.021 | 0.009 |
| 195 | S | 0.003 | 0.010 | 0.008 |  | 195 | pS | 0.017 | 0.017 | 0.059 |
| 196 | E | 0.011 | 0.015 | 0.004 |  | 196 | E  | 0.033 | 0.069 | 0.011 |
| 197 | E |       |       |       |  | 197 | E  | 0.021 | 0.038 | 0.022 |

|     |   |       |       |       |  |     |    |       |       |       |
|-----|---|-------|-------|-------|--|-----|----|-------|-------|-------|
| 198 | L | 0.004 | 0.013 | 0.006 |  | 198 | L  | 0.016 | 0.035 | 0.006 |
| 199 | N | 0.008 | 0.019 | 0.011 |  | 199 | N  | 0.010 | 0.032 | 0.006 |
| 200 | G | 0.003 | 0.011 | 0.005 |  | 200 | G  | 0.004 | 0.008 | 0.007 |
| 201 | A | 0.003 | 0.011 | 0.000 |  | 201 | A  | 0.005 | 0.015 | 0.000 |
| 202 | Y | 0.005 | 0.013 | 0.000 |  | 202 | Y  | 0.004 | 0.023 | 0.005 |
| 203 | K | 0.010 | 0.009 | 0.008 |  | 203 | K  | 0.011 | 0.018 | 0.003 |
| 204 | A | 0.004 | 0.004 | 0.004 |  | 204 | A  | 0.004 | 0.009 | 0.002 |
| 205 | I | 0.008 | 0.010 | 0.004 |  | 205 | I  | 0.020 | 0.030 | 0.009 |
| 206 | P |       |       |       |  | 206 | P  |       |       |       |
| 207 | V | 0.006 | 0.006 | 0.000 |  | 207 | V  | 0.020 | 0.026 | 0.005 |
| 208 | A | 0.012 | 0.017 | 0.002 |  | 208 | A  | 0.034 | 0.054 | 0.012 |
| 209 | Q | 0.014 | 0.012 | 0.004 |  | 209 | Q  | 0.020 | 0.037 | 0.007 |
| 210 | D | 0.004 | 0.014 | 0.000 |  | 210 | D  | 0.016 | 0.019 | 0.003 |
| 211 | L | 0.005 | 0.010 | 0.006 |  | 211 | L  | 0.007 | 0.012 | 0.004 |
| 212 | N | 0.001 | 0.010 | 0.000 |  | 212 | N  | 0.033 | 0.036 | 0.010 |
| 213 | A | 0.003 | 0.002 | 0.002 |  | 213 | A  | 0.036 | 0.046 | 0.008 |
| 214 | P |       |       |       |  | 214 | P  |       |       |       |
| 215 | S | 0.013 | 0.020 | 0.000 |  | 215 | pS | 0.022 | 0.039 | 0.011 |
| 216 | D | 0.006 | 0.012 | 0.006 |  | 216 | D  | 0.012 | 0.019 | 0.005 |
| 217 | W | 0.006 | 0.010 | 0.007 |  | 217 | W  | 0.013 | 0.048 | 0.010 |
| 218 | D | 0.005 | 0.004 | 0.000 |  | 218 | D  | 0.027 | 0.052 | 0.010 |
| 219 | S | 0.007 | 0.006 | 0.002 |  | 219 | pS | 0.049 | 0.044 | 0.082 |
| 220 | R | 0.008 | 0.009 | 0.001 |  | 220 | R  | 0.017 | 0.006 | 0.009 |
| 221 | G | 0.000 | 0.005 | 0.006 |  | 221 | G  | 0.014 | 0.027 | 0.006 |
| 222 | K | 0.012 | 0.008 | 0.010 |  | 222 | K  | 0.002 | 0.028 | 0.000 |
| 223 | D | 0.006 | 0.004 | 0.000 |  | 223 | D  | 0.014 | 0.014 | 0.010 |
| 224 | S | 0.006 | 0.013 | 0.001 |  | 224 | pS | 0.048 | 0.039 | 0.068 |
| 225 | Y | 0.003 | 0.017 | 0.003 |  | 225 | Y  | 0.018 | 0.049 | 0.014 |
| 226 | E | 0.003 | 0.015 | 0.004 |  | 226 | E  | 0.049 | 0.097 | 0.008 |
| 227 | T | 0.005 | 0.006 | 0.000 |  | 227 | T  | 0.029 | 0.032 | 0.010 |
| 228 | S | 0.007 | 0.007 | 0.010 |  | 228 | pS | 0.011 | 0.072 | 0.041 |
| 229 | Q | 0.006 | 0.008 | 0.004 |  | 229 | Q  | 0.025 | 0.042 | 0.008 |
| 230 | L | 0.010 | 0.015 | 0.005 |  | 230 | L  |       |       |       |
| 231 | D | 0.005 | 0.013 | 0.004 |  | 231 | D  |       |       |       |
| 232 | D |       |       |       |  | 232 | D  |       |       |       |
| 233 | Q | 0.004 | 0.006 | 0.007 |  | 233 | Q  |       |       |       |
| 234 | S | 0.007 | 0.003 | 0.006 |  | 234 | pS | 0.076 | 0.066 | 0.052 |
| 235 | A | 0.009 | 0.014 | 0.004 |  | 235 | A  | 0.016 | 0.039 | 0.013 |
| 236 | E | 0.005 | 0.011 | 0.006 |  | 236 | E  | 0.023 | 0.052 | 0.019 |
| 237 | T | 0.003 | 0.005 | 0.007 |  | 237 | T  | 0.018 | 0.047 | 0.020 |
| 238 | H |       |       |       |  | 238 | H  | 0.021 | 0.033 | 0.004 |
| 239 | S |       |       |       |  | 239 | S  | 0.014 | 0.024 | 0.004 |
| 240 | H |       |       |       |  | 240 | H  | 0.000 | 0.029 | 0.006 |
| 241 | K |       |       |       |  | 241 | K  |       |       |       |
| 242 | Q |       |       |       |  | 242 | Q  |       |       |       |
| 243 | S |       |       |       |  | 243 | S  | 0.024 | 0.028 | 0.007 |
| 244 | R |       |       |       |  | 244 | R  | 0.015 | 0.020 | 0.012 |

|     |   |       |       |       |  |     |    |       |       |       |
|-----|---|-------|-------|-------|--|-----|----|-------|-------|-------|
| 245 | L | 0.028 | 0.036 | 0.000 |  | 245 | L  | 0.006 | 0.026 | 0.008 |
| 246 | Y | 0.017 | 0.025 | 0.007 |  | 246 | Y  | 0.013 | 0.046 | 0.010 |
| 247 | K | 0.021 | 0.035 | 0.006 |  | 247 | K  | 0.003 | 0.028 | 0.007 |
| 248 | R | 0.004 | 0.004 | 0.008 |  | 248 | R  | 0.010 | 0.015 | 0.003 |
| 249 | K | 0.003 | 0.006 | 0.008 |  | 249 | K  | 0.008 | 0.022 | 0.000 |
| 250 | A | 0.002 | 0.007 | 0.004 |  | 250 | A  | 0.014 | 0.027 | 0.007 |
| 251 | N | 0.011 | 0.022 | 0.012 |  | 251 | N  | 0.009 | 0.037 | 0.001 |
| 252 | D | 0.014 | 0.020 | 0.002 |  | 252 | D  | 0.012 | 0.024 | 0.006 |
| 253 | E | 0.011 | 0.024 | 0.004 |  | 253 | E  | 0.013 | 0.058 | 0.010 |
| 254 | S | 0.004 | 0.007 | 0.008 |  | 254 | pS | 0.041 | 0.031 | 0.080 |
| 255 | N | 0.009 | 0.030 | 0.017 |  | 255 | N  | 0.030 | 0.057 | 0.020 |
| 256 | E | 0.004 | 0.005 | 0.005 |  | 256 | E  | 0.008 | 0.008 | 0.007 |
| 257 | H | 0.027 | 0.037 | 0.012 |  | 257 | H  | 0.014 | 0.025 | 0.005 |
| 258 | S | 0.014 | 0.023 | 0.015 |  | 258 | pS | 0.016 | 0.023 | 0.008 |
| 259 | D | 0.002 | 0.002 | 0.007 |  | 259 | D  | 0.007 | 0.011 | 0.002 |
| 260 | V | 0.004 | 0.002 | 0.005 |  | 260 | V  | 0.070 | 0.087 | 0.016 |
| 261 | I | 0.006 | 0.003 | 0.007 |  | 261 | I  | 0.071 | 0.127 | 0.022 |
| 262 | D | 0.005 | 0.006 | 0.004 |  | 262 | D  | 0.006 | 0.040 | 0.007 |
| 263 | S | 0.006 | 0.014 | 0.004 |  | 263 | pS | 0.025 | 0.050 | 0.064 |
| 264 | Q | 0.002 | 0.006 | 0.010 |  | 264 | Q  | 0.011 | 0.009 | 0.006 |
| 265 | E |       |       |       |  | 265 | E  | 0.010 | 0.016 | 0.009 |
| 266 | L | 0.004 | 0.012 | 0.004 |  | 266 | L  | 0.021 | 0.016 | 0.006 |
| 267 | S | 0.017 | 0.031 | 0.005 |  | 267 | S  | 0.013 | 0.019 | 0.000 |
| 268 | K | 0.006 | 0.009 | 0.003 |  | 268 | K  | 0.029 | 0.043 | 0.001 |
| 269 | V | 0.007 | 0.014 | 0.000 |  | 269 | V  | 0.035 | 0.062 | 0.005 |
| 270 | S | 0.007 | 0.006 | 0.014 |  | 270 | pS | 0.035 | 0.107 | 0.029 |
| 271 | R | 0.004 | 0.005 | 0.017 |  | 271 | R  |       |       |       |
| 272 | E |       |       |       |  | 272 | E  |       |       |       |
| 273 | F | 0.024 | 0.027 | 0.013 |  | 273 | F  |       |       |       |
| 274 | H |       |       |       |  | 274 | H  |       |       |       |
| 275 | S |       |       |       |  | 275 | pS | 0.031 | 0.071 | 0.024 |
| 276 | H |       |       |       |  | 276 | H  | 0.027 | 0.047 | 0.010 |
| 277 | E |       |       |       |  | 277 | E  | 0.014 | 0.018 | 0.015 |
| 278 | F |       |       |       |  | 278 | F  | 0.017 | 0.022 | 0.020 |
| 279 | H |       |       |       |  | 279 | H  | 0.036 | 0.018 | 0.000 |
| 280 | S |       |       |       |  | 280 | pS | 0.031 | 0.115 | 0.020 |
| 281 | H |       |       |       |  | 281 | H  | 0.041 | 0.105 | 0.016 |
| 282 | E |       |       |       |  | 282 | E  | 0.044 | 0.043 | 0.011 |
| 283 | D |       |       |       |  | 283 | D  |       |       |       |
| 284 | M | 0.007 | 0.010 | 0.007 |  | 284 | M  | 0.018 | 0.035 | 0.001 |
| 285 | L | 0.012 | 0.020 | 0.000 |  | 285 | L  | 0.047 | 0.097 | 0.010 |
| 286 | V | 0.011 | 0.014 | 0.004 |  | 286 | V  | 0.009 | 0.006 | 0.006 |
| 287 | V | 0.001 | 0.001 | 0.004 |  | 287 | V  | 0.030 | 0.045 | 0.008 |
| 288 | D | 0.002 | 0.002 | 0.001 |  | 288 | D  | 0.020 | 0.031 | 0.004 |
| 289 | P |       |       |       |  | 289 | P  |       |       |       |
| 290 | K | 0.005 | 0.009 | 0.004 |  | 290 | K  |       |       |       |
| 291 | S | 0.004 | 0.006 | 0.003 |  | 291 | S  |       |       |       |

|     |   |       |       |       |  |     |    |       |       |       |
|-----|---|-------|-------|-------|--|-----|----|-------|-------|-------|
| 292 | K | 0.007 | 0.009 | 0.003 |  | 292 | K  |       |       |       |
| 293 | E |       |       |       |  | 293 | E  |       |       |       |
| 294 | E |       |       |       |  | 294 | E  |       |       |       |
| 295 | D |       |       |       |  | 295 | D  |       |       |       |
| 296 | K | 0.014 | 0.013 | 0.014 |  | 296 | K  |       |       |       |
| 297 | H | 0.041 | 0.048 | 0.010 |  | 297 | H  |       |       |       |
| 298 | L | 0.003 | 0.006 | 0.000 |  | 298 | L  |       |       |       |
| 299 | K | 0.033 | 0.064 | 0.008 |  | 299 | K  |       |       |       |
| 300 | F |       |       |       |  | 300 | F  |       |       |       |
| 301 | R |       |       |       |  | 301 | R  |       |       |       |
| 302 | I |       |       |       |  | 302 | I  |       |       |       |
| 303 | S |       |       |       |  | 303 | S  |       |       |       |
| 304 | H |       |       |       |  | 304 | H  |       |       |       |
| 305 | E |       |       |       |  | 305 | E  |       |       |       |
| 306 | L | 0.014 | 0.020 | 0.006 |  | 306 | L  | 0.049 | 0.066 | 0.015 |
| 307 | D | 0.035 | 0.039 | 0.016 |  | 307 | D  | 0.027 | 0.023 | 0.022 |
| 308 | S | 0.004 | 0.016 | 0.002 |  | 308 | pS | 0.060 | 0.047 | 0.114 |
| 309 | A | 0.005 | 0.014 | 0.007 |  | 309 | A  | 0.090 | 0.159 | 0.025 |
| 310 | S | 0.008 | 0.009 | 0.004 |  | 310 | pS | 0.089 | 0.065 | 0.103 |
| 311 | S | 0.009 | 0.011 | 0.006 |  | 311 | pS | 0.024 | 0.041 | 0.016 |
| 312 | E | 0.005 | 0.005 | 0.002 |  | 312 | E  | 0.025 | 0.048 | 0.000 |
| 313 | V | 0.009 | 0.011 | 0.004 |  | 313 | V  | 0.044 | 0.084 | 0.020 |
| 314 | N | 0.012 | 0.023 | 0.002 |  | 314 | N  | 0.021 | 0.049 | 0.007 |
